# Supplementary material for: Acute Kidney Injury Associated with Severe SARS-CoV-2 Infection: Risk Factors for Morbidity and Mortality and a Potential Benefit of Combined Therapy with Tocilizumab and Corticosteroids
Source: MDPI journal article supplement (doi:10.3390/biomedicines11030845), 2023-03-10
Supplement: s1 [file s1]

**Supplemental table S1. missing values of Biomarkers**

| Biomarker      | Valid values | Percent missing |
|----------------|--------------|-----------------|
| D Dimer Day 1  | 112          | 55%             |
| D Dimer Day 2  | 81           | 67%             |
| CRP day 1      | 101          | 55%             |
| CRP day 2      | 82           | 67%             |
| Ferritin Day 1 | 119          | 56%             |
| Ferritin day 2 | 105          | 58%             |
